## Minireview

# Evolution and Nomenclature of the Zona Pellucida Gene Family

Scott C. Spargo<sup>1</sup> and Rory M. Hope

Laboratory of Molecular Evolution, Department of Molecular Biosciences, University of Adelaide,  
South Australia 5005, Australia

### ABSTRACT

Three subfamilies of genes are acknowledged within the zona pellucida (ZP) gene family. At present, these subfamilies each have two names that are used interchangeably: ZPA or ZP2, ZPB or ZP1, and ZPC or ZP3. The ZPA genes encode the longest protein sequences and the ZPC genes the shortest. Recently, several sequences, which have no clear relationship to the three subfamilies, have been identified. These sequences include two paralogous ZP genes from *Xenopus laevis* and a single gene from the fish *Oryzias latipes*. We have conducted extensive phylogenetic analyses of the known ZP genes. As well as establishing the evolutionary relationships among these genes, the analyses make it clear that the dual nomenclature system is no longer feasible, because major paralogous groups are present in the ZPB (ZP1) family of genes of amniotes. We propose a unified system of nomenclature for the ZP gene family that removes the existing ambiguities.

gamete biology

### INTRODUCTION

A glycoprotein coat surrounds all ovulated, vertebrate oocytes. This coat has a different name in each major vertebrate lineage: the chorion in fish, the vitelline envelope in amphibians, the perivitelline envelope in reptiles and birds, and the zona pellucida in mammals. Despite their different names, the gross structure and function of these egg coats are similar, and they will be referred to collectively as the zona pellucida, or ZP. ZP are composed of cross-linked, sulfated glycoproteins [1, 2]. Early studies in *Mus musculus* and *Rattus norvegicus* identified three glycoprotein components of the ZP using SDS-PAGE; these components were named ZP1, ZP2, and ZP3 from highest to lowest apparent molecular weight, respectively [3, 4]. Subsequent ZP glycoproteins have been named according to several criteria, including apparent molecular weight of the glycoprotein [5], protein sequence length [6], and sequence identity comparisons [7, 8].

By 1994, inconsistent naming of the ZP genes had resulted in a confused system of nomenclature, making com-

munication about the ZP gene family difficult. To overcome this difficulty, Harris et al. [6] proposed a unified system of nomenclature in which ZP genes were named in order of the length of their encoded protein sequence, from longest to shortest. Unfortunately, under these criteria, the mouse ZP genes fall in the order ZP2, then ZP1, and then ZP3. To avoid confusion arising from swapping the names of mouse ZP1 and ZP2, a new letter-based system was introduced. Thus, ZP2 became ZPA, ZP1 became ZPB, and ZP3 became ZPC. Acceptance of the proposed new system of nomenclature has been less than universal, with the number system and the letter system being used concurrently by different groups [9, 10].

The complete cDNA sequence of the mouse ZP1 gene was determined subsequent to the sequence of the human ZPB cDNA sequence [6, 11]. It was assumed that the mouse ZP1 was orthologous to human ZPB (i.e., both genes descended from a single common ancestral gene that diverged at a speciation event), because it shared greater amino acid sequence identity with human ZPB than with human ZPA or ZPC. Even before publication of the chicken and human ZP1 gene sequences [7, 12], phylogenetic analyses suggested that mouse ZP1 and human ZPB were paralogous (i.e., descended from different genes created by a gene duplication). Hughes and Barrett [12] identified a human genomic sequence orthologous to the mouse ZP1 gene and paralogous to the human ZPB gene. Soon after, Bausek et al. [7] published the sequence of a chicken ZP1 gene. Their analysis suggested that a gene duplication, predating the divergence of fish and amphibians, gave rise to two paralogous groups of genes within the ZPB subfamily: ZP1 and ZPB.

Whereas the mammalian ZP has three main glycoprotein components, the egg envelope of *Xenopus laevis* is comprised of six or more [4]. An orthologue of each of the three groups of mammalian ZP glycoprotein has been found in *X. laevis* [5, 13, 14]. Two additional *X. laevis* ZP genes, with no known mammalian orthologues, have also been characterized: ZPAX [15] and ZPA [16]. An additional gene in *Oryzias latipes*, called ZPA, shares a high level of sequence identity with the *X. laevis* ZPAX gene. Evolutionary analysis suggested that the *Xenopus* ZPA gene is an orthologue of the human and pig ZPA genes and that ZPAX evolved from a gene paralogous to the precursor of the ZPA and ZPB genes [15].

The three accepted subfamilies of genes within the ZP gene family each have two names at present: ZPA or ZP2, ZPB or ZP1, and ZPC or ZP3. The difficulties in maintain-

<sup>1</sup>Correspondence. FAX: 61 08 83034362;  
e-mail: scott.spargo@adelaide.edu.au

Received: 10 June 2002.

First decision: 25 June 2002.

Accepted: 8 July 2002.

© 2003 by the Society for the Study of Reproduction, Inc.

ISSN: 0006-3363. <http://www.biolreprod.org>

ing this dual nomenclature system have come to a head. It is no longer possible to use ZPB and ZP1 interchangeably to describe the same orthologous set of genes, because a subset of the genes called ZP1 is paralogous to other ZPB (ZP1) genes. In addition to these three subfamilies, two ZP genes from *X. laevis* and one ZP gene from *O. latipes* have evolutionary origins that are uncertain. Here, we show the relationships within the ZP gene family in a comprehensive phylogeny based on an analysis of cDNA sequences, and we use the phylogeny to address problems with the current system of nomenclature.

## PHYLOGENETIC ANALYSES

### Methodology

Sequences included in phylogenetic analyses of the ZP genes are listed in Table 1. This table includes the name for each of the genes as it appears in the GenBank database together with a suggested name based on the phylogenetic relationships established in the present study.

Nucleotide sequence alignments of the ZP genes were carried out based on protein sequence alignments using both BioEdit [17] and CLUSTAL W [18] software. Phylogenetic analyses were carried out using the following methods: 1) maximum parsimony with bootstrap; 2) UPGMA (unweighted pair group method with arithmetic mean) using maximum likelihood distances with bootstrap (PHYLIP software [19]); 3) maximum likelihood (PAUP software [20]); 4) likelihood with Markov-chain Monte Carlo (MCMC) sampling (BAMBE software [21]); and 5) quartet puzzling (Puzzle [22]).

Bootstrap analyses were conducted using 1000 pseudo-replicates (parsimony) or 100 pseudoreplicates (maximum likelihood distances) of the data set. Likelihood with MCMC analyses were performed using the likelihood model described by Tamura and Nei [23]. Codon positions were analyzed independently of each other. Nucleotide frequencies and substitution rates were estimated independently for each codon position. Branch swapping was global for both the burn-in and the cycling phase. The rate of convergence of the Markov chain to the posterior distribution was optimized as directed by the authors of the BAMBE program. The consensus tree shown (Fig. 1) was found in three separate runs from random starting points, suggested by Simon and Larget [21] as the minimum requirement for demonstrating sufficient sampling from the posterior probability distribution. Relative rates tests were performed using the program K2wuli [24], which conducts the relative rates test described by Wu and Li [25].

### BAMBE Tree

The results of a likelihood analysis with MCMC are shown in Figure 1. A clear hierarchy of relatedness is apparent in the unrooted phylogeny of the ZP genes (Fig. 1). A suggestion for a consistent nomenclature system, based on the hierarchical structure of this phylogeny, is outlined later. At the highest level of the hierarchy lies the gene family, which includes every ZP gene. The gene family can be easily separated into four subfamilies, which are indicated in Figure 1. All the genes of a subfamily are paralogous to all the genes of other subfamilies. The genes in each of the ZPA, ZPB, and ZPC subfamilies can be traced to a single ancestral duplicate gene. The genes of the ZPX subfamily can be traced to two ancestral duplicate genes. Characterization of additional ZPX genes is required to de-

termine if these genes are a single subfamily encompassing two paralogous lineages (like the ZPB subfamily) or two distinct subfamilies. A third level of hierarchy exists within the ZPB subfamily, which has three gene groups: ZPB, ZPB1, and ZPB2. The ZPB group is orthologous to both the ZPB1 and ZPB2 groups, whereas the two latter groups are paralogous, having evolved from different duplicates of an ancestral ZPB gene. It is unfortunate that the probabilities associated with the branching points of the ZPX genes are low. This may be attributed to the duplications that gave rise to both ZPX paralogues and the ZPB and ZPA subfamilies occurring over a short period of evolution, then being reconstructed after a comparatively long period of evolution.

### Other Methods

The major branches of the maximum parsimony and the maximum likelihood distance trees had an identical topology to the tree shown in Figure 1. The bootstrap values associated with both trees were generally lower than published logical probabilities (data not shown; available on request). Branching orders of the *X. laevis* ZPX2 (*xenopusax*) and the ZPX1 genes were supported by maximum parsimony bootstrap values of 65% and 52%, respectively. The maximum likelihood distance tree placed the ZPX genes in their illustrated position with a bootstrap of 81% (though the relationships between the individual ZPX genes were unresolved). Quartet puzzling was unable to resolve any of the deep branches of the ZP gene tree.

## EVOLUTIONARY HISTORY

At least one ZP gene evolved during the earliest stages of vertebrate evolution. This is apparent because every major vertebrate lineage has ZP genes and because the phylogenetic relationships indicate that all the major subfamilies of ZP genes evolved before the divergence of fish and amphibians. Because the products of all known ZP genes are components of the glycoprotein egg coat, the first ZP protein product likely fulfilled a related function. As a consequence of the ancient origins of the ZP gene family, identification of an appropriate outgroup for the full-length ZP gene sequences has not been possible. Without an outgroup, it is difficult to determine the temporal order of events in ZP gene evolution. Several alternate approaches were used to determine the likely order in which the subfamilies and groups of ZP genes evolved.

Almost all ZP genes have a signal peptide at their N-terminus and a *trans*-membrane domain at their C-terminus. Between these two domains, ZP genes have a conserved region originally characterized in the ZP genes: the ZP domain [26]. No appropriate outgroup exists for use with full-length ZP cDNA sequences, but other known sequences contain ZP domains [26, 27]. When the ZP domain of chicken  $\beta$ -tectorin was used as an outgroup for phylogenetic analyses of the ZP domains of the ZP genes, the root of the tree consistently lay between the ZPC subfamily and the remainder of the tree. Confidence levels associated with the branching order of the ZP domain trees were lower than those on the full-length tree (Fig. 1), and small changes in the branching order were observed.

Another approach to identifying the most ancient branch of the ZP gene phylogeny required the assumption that the ZP genes evolved in a clock-like manner (i.e., that the rates of nucleotide substitution are approximately equal for the genes being studied). If this assumption holds true within

TABLE 1. Characterized genes belonging to the ZP gene family.

| Species name                                                        | Common name                   | Tree label            | Accession no.       | GenBank name         | Suggested name    |                         |     |
|---------------------------------------------------------------------|-------------------------------|-----------------------|---------------------|----------------------|-------------------|-------------------------|-----|
| <i>Callithrix jacchus</i>                                           | Marmoset                      | marmoset-1            | Y10822              | ZP1                  | ZPB2              |                         |     |
|                                                                     |                               | marmoset-2            | Y10767              | ZP2                  | ZPA               |                         |     |
| <i>Canis familiaris</i>                                             | Dog                           | dog-c                 | U05780              | ZPC                  | ZPC               |                         |     |
|                                                                     |                               | dog-a                 | U05779              | ZPA                  | ZPA               |                         |     |
| <i>Carassius auratus</i>                                            | Goldfish                      | goldfish-3            | Z48974              | ZP3                  | ZPC               |                         |     |
| <i>Coturnix japonica</i>                                            | Japanese quail                | quail-1               | AB061520            | ZP1                  | ZPB1              |                         |     |
| <i>Cyprinus carpio</i>                                              | Common carp                   | carp-3a/3c            | L41637/L41639       | ZP3A/3C              | ZPCa <sup>a</sup> |                         |     |
|                                                                     |                               | carp-3b               | L41638              | ZP3B                 | ZPCb <sup>a</sup> |                         |     |
|                                                                     |                               | carp-2a               | Z72491              | ZP2a                 | ZPBb <sup>b</sup> |                         |     |
|                                                                     |                               | carp-2b               | Z72492              | ZP2b                 | ZPBa <sup>b</sup> |                         |     |
|                                                                     |                               | carp-2c               | Z72493              | ZP2c                 | ZPBc <sup>b</sup> |                         |     |
|                                                                     |                               | zebrafish-3           | AF095457            | ZP3                  | ZPC               |                         |     |
| <i>Danio rerio</i>                                                  | Zebrafish                     | zebrafish-2           | AF331968            | ZP2                  | ZPB               |                         |     |
| <i>Felis catus</i>                                                  | Cat                           | cat-a                 | U05776              | ZPA                  | ZPA               |                         |     |
|                                                                     |                               | cat-b                 | U05777              | ZPB                  | ZPB2              |                         |     |
|                                                                     |                               | cat-c                 | U05778              | ZPC                  | ZPC               |                         |     |
| <i>Gallus gallus</i>                                                | Chicken                       | chicken-1             | AJ28967             | ZP1                  | ZPB1              |                         |     |
|                                                                     |                               | chicken-b             | AB025428            | ZPB                  | ZPB2              |                         |     |
|                                                                     |                               | chicken-c             | AB031033            | ZPC                  | ZPC               |                         |     |
| <i>Homo sapiens</i>                                                 | Human                         | human-a               | M90366              | ZPA                  | ZPA               |                         |     |
|                                                                     |                               | human-b               | U05781              | ZPB                  | ZPB2              |                         |     |
|                                                                     |                               | human-c               | A18567              | ZPC                  | ZPC               |                         |     |
|                                                                     |                               | human-1               | AC004126            | ZP1                  | ZPB1              |                         |     |
| <i>Macaca radiata</i>                                               | Macaque                       | macaque-1             | Y10381              | ZP1                  | ZPB2              |                         |     |
|                                                                     |                               | macaque-2             | Y10690              | ZP2                  | ZPA               |                         |     |
|                                                                     |                               | macaque-3             | X82639              | ZP3                  | ZPC               |                         |     |
| <i>Mesocricetus auratus</i>                                         | Golden hamster                | hamster-3             | M63629              | ZP3                  | ZPC               |                         |     |
| <i>Microtus brandti</i>                                             | Brandt's vole                 | vole-c                | AF304487            | ZPC                  | ZPC               |                         |     |
| <i>Mus musculus</i>                                                 | House mouse                   | mouse-1               | MN_009580           | ZP1                  | ZPB1              |                         |     |
|                                                                     |                               | mouse-2               | NM_011775           | ZP2                  | ZPA               |                         |     |
|                                                                     |                               | mouse-3               | NM_011776           | ZP3                  | ZPC               |                         |     |
| <i>Notomys alexis</i>                                               | Hopping mouse                 | nalex-c               | AY078054            | ZPC                  | ZPC               |                         |     |
| <i>Oncorhynchus mykiss</i>                                          | Rainbow trout                 | trout- $\alpha$       | AF231706            | VEP alpha            | ZPBa <sup>c</sup> |                         |     |
|                                                                     |                               | trout- $\beta$        | AF231707            | VEP beta             | ZPBb <sup>c</sup> |                         |     |
|                                                                     |                               | trout- $\gamma$       | AF231708            | VEP gamma            | ZPC               |                         |     |
| <i>Oryctolagus cuniculus</i><br><i>Oryzias latipes</i> <sup>d</sup> | Rabbit                        | rabbit                | M58160              | ZP                   | ZPB2              |                         |     |
|                                                                     |                               | medaka-a              | AF128807            | ZPA                  | ZPX1              |                         |     |
|                                                                     | Japanese medaka               | medaka-b              | AF128808            | ZPB                  | ZPBa              |                         |     |
|                                                                     |                               | medaka-c1             | AF128809            | ZPC protein 1        | ZPCe              |                         |     |
|                                                                     |                               | medaka-c3             | AF128811            | ZPC protein 3        | ZPCd              |                         |     |
|                                                                     |                               | medaka-c4             | AF128812            | ZPC protein 4        | ZPCb              |                         |     |
|                                                                     |                               | medaka-c5             | AF128813            | ZPC protein 5        | ZPCa              |                         |     |
|                                                                     |                               | medaka-cgH            | D89609              | choriogenin H        | ZPBb              |                         |     |
|                                                                     |                               | medaka-lsf            | D38630              | L-SF                 | ZPCc              |                         |     |
|                                                                     |                               | paust-c               | AY078055            | ZPC                  | ZPC               |                         |     |
| <i>Pseudomys australis</i><br><i>Pseudopleuronectes americanus</i>  | Plains rat<br>Winter flounder | flounder              | U03674              | ZP                   | ZPB               |                         |     |
|                                                                     |                               | rat-1                 | AB000928            | ZP1                  | ZPB1              |                         |     |
| <i>Rattus norvegicus</i>                                            | Rat                           | rat-2                 | NM_031150           | ZP2                  | ZPA               |                         |     |
|                                                                     |                               | rat-3                 | D78482              | ZP3                  | ZPC               |                         |     |
|                                                                     |                               | salmon-esp            | AJ000665            | ZPB                  | ZPB               |                         |     |
| <i>Salmo salar</i>                                                  | Salmon                        | pig-1/2               | S74651/D45064       | ZP1/2                | ZPA <sup>e</sup>  |                         |     |
| <i>Sus scrofa</i>                                                   | Pig                           | pig-3                 | D45065              | ZP3                  | ZPC               |                         |     |
|                                                                     |                               | possum-a              | AF263014            | ZPA                  | ZPA               |                         |     |
|                                                                     |                               | possum-b              | AF263013            | ZPB                  | ZPB               |                         |     |
| <i>Trichosurus vulpecula</i>                                        | Brush-tailed possum           | possum-3              | AF079524            | ZP3                  | ZPC?              |                         |     |
|                                                                     |                               | <i>Xenopus laevis</i> | African clawed frog | <i>X. laevis</i> -69 | AF038151          | 69 kDa/ZPA <sup>f</sup> | ZPA |
|                                                                     |                               | <i>X. laevis</i> -37  |                     | U44950               | 37 kDa            | ZPB                     |     |
| <i>X. laevis</i> -c                                                 | U44952                        | ZPC                   |                     | ZPC                  |                   |                         |     |
| <i>X. laevis</i> -ax                                                | AF225906                      | ZPAX                  |                     | ZPX1                 |                   |                         |     |
| <i>X. laevis</i> -a                                                 | U44949                        | ZPA <sup>f</sup>      |                     | ZPX2                 |                   |                         |     |

<sup>a</sup> *Cyprinus carpio* (carp) ZP3A and ZP3C (current nomenclature) are most closely related to each other in the phylogeny and share 96% sequence identity. They are probably alleles of the same gene and are putatively called carp ZPCb. Carp has a second, larger ZPC gene now called carp ZPCa.

<sup>b</sup> *Cyprinus carpio* (carp) ZP2A, ZP2B, and ZP2C (current nomenclature) are more closely related to each other than the other fish ZPB genes. It is not certain whether these sequences are separate genes, alleles of the same gene, or a combination of both. They are temporarily assigned the name ZPB and lettered in order of protein sequence length; ZPBa (2B), ZPBb (2A) and ZPBc (2C).

<sup>c</sup> The *Oncorhynchus mykiss* (rainbow trout) ZP genes, currently called vitelline envelope proteins  $\alpha$  and  $\beta$ , share 72% identity in their cDNA. Based on this low level of sequence identity, these genes are putatively classed as paralogues and temporarily assigned the names ZPBa (alpha) and ZPBb (beta).

<sup>d</sup> The *Oryzias latipes* (Japanese medaka) ZPB genes, currently ZPB and choriogenin-H, are clearly shown to be paralogues in the phylogeny. ZPB is now ZPBa, and choriogenin-H is now ZPBb. The ZPC genes, currently five full-length sequences, are lettered from largest to smallest protein products (ZPCa to ZPCe).

<sup>e</sup> *Sus scrofa* (pig) ZP1 and ZP2 sequences share 99% nucleotide sequence identity over 2203 base pairs. This suggests, in the absence of intron sequence data, that these sequences are alleles of the same gene, *S. scrofa* ZPA.

<sup>f</sup> *Xenopus laevis* sequences xla69 and xla1 are both listed as xLZPA in GenBank, though they are different genes.

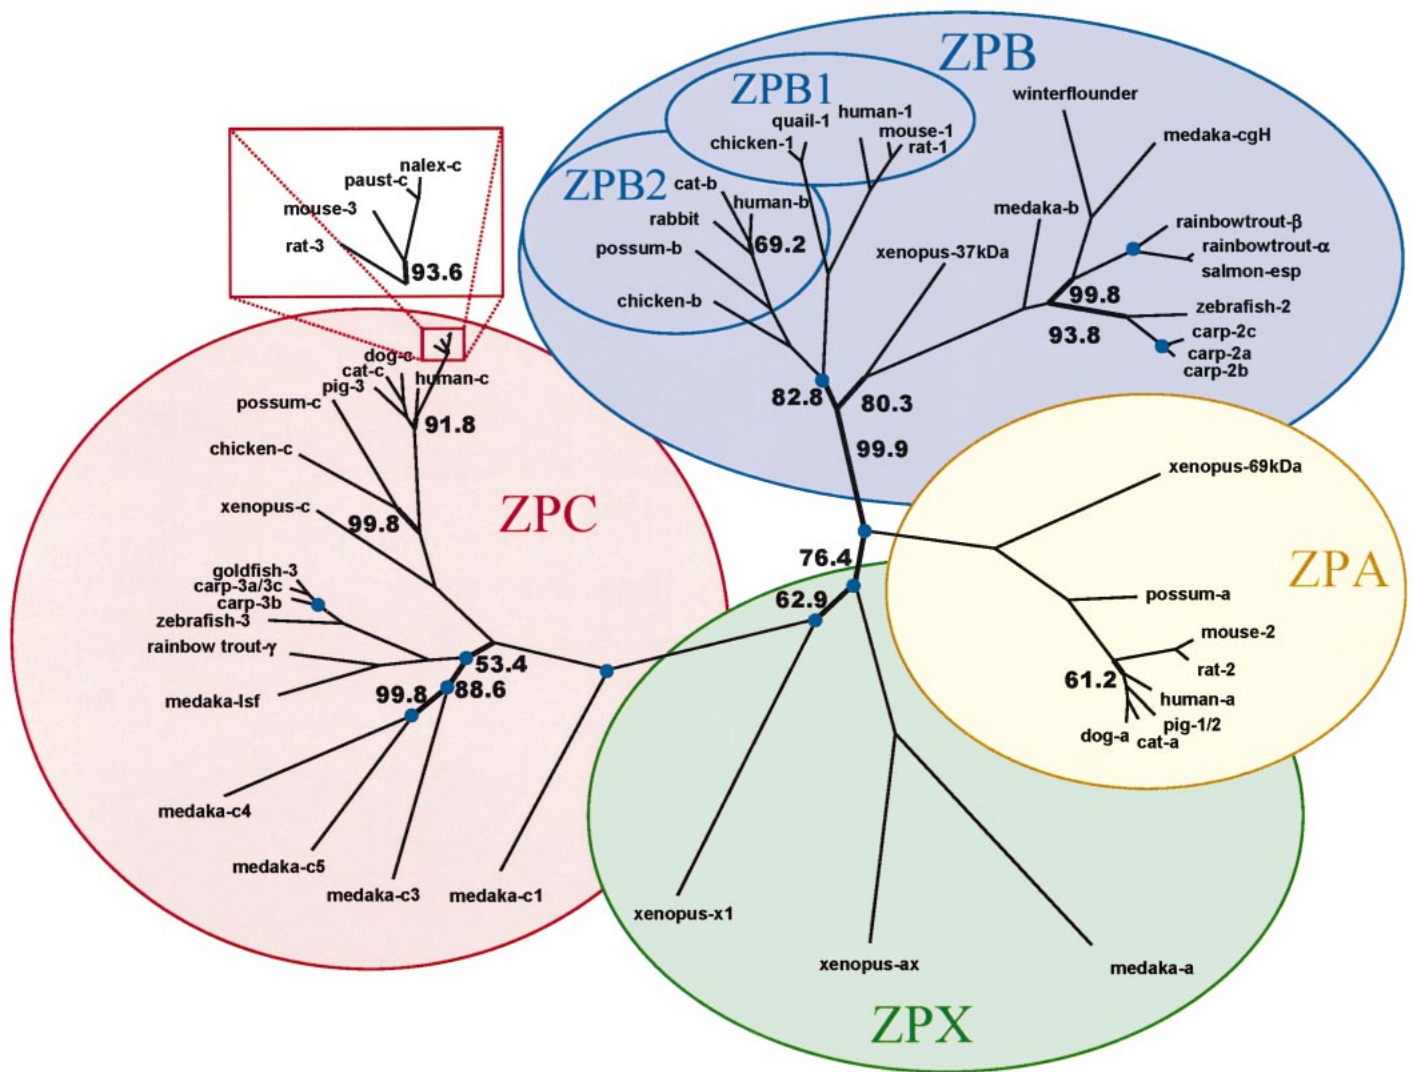

FIG. 1. Phylogenetic tree of the ZP gene family derived using likelihood with MCMC (BAMBE [21]). Several of the genes in Table 1 are not present here because of computational limitations. Relative branch lengths indicate rates of evolution along a particular branch. Subfamilies of ZP genes are labeled (ZPA, ZPB, ZPC, and ZPX), and groups are also labeled (ZPB1 and ZPB2). Logical probabilities associated with branching orders and sequences likely to be alleles of the same gene are indicated. Where probabilities are not shown, the value is 100%. Internal branching nodes, which can only be explained by a duplication event, are marked with an open circle. In the absence of contradictory evidence, other branching nodes are assumed to represent speciation events.

statistical limits and a phylogeny is derived under this assumption, then the deepest branch of this phylogeny should approximate the position of the root of the tree. Relative-rates tests using the method of Wu and Li [25], which requires an outgroup, showed that the assumption of a molecular clock held true across the ZP domain of almost all of the ZP genes (data not shown). Rodent ZPAs, *X. laevis* ZPC, and the ZPB1 genes were the exceptions. Subsequent UPGMA and BAMBE analyses, for which the molecular clock was assumed, of both full-length and ZP domain sequences supported a phylogenetic root between the ZPC subfamily and the remainder of the tree.

These findings provide some evidence that the first event in ZP evolution was a gene duplication event, which gave rise to the ancestral ZPC gene and to the precursor of the ZPA, ZPB, and ZPX subfamilies. This precursor duplicated at least three times over a short period of evolutionary history, giving rise to the ancestral ZPX genes and the ancestral ZPA and ZPB genes. These events all occurred early during vertebrate evolution, before evolution of the first

amphibians. Subsequently, duplication events have occurred in several lineages, with the most notable occurring early during evolution of the amniotes and giving rise to the ZPB1 and ZPB2 groups within the ZPB subfamily.

Other important observations and conclusions can be inferred from the tree shown in Figure 1. First, a consistent grouping, supported by all the phylogenetic methods used, of the *Gallus gallus* (chicken) and *Trichosurus vulpecula* (brush-tailed possum) ZPC genes to the exclusion of other ZPC genes is observed. A possible explanation for this relationship is that the chicken and possum ZPC genes are paralogous to the eutherian ZPC genes. Second, the gene duplication that gave rise to the ZPA genes occurred before the divergence of fish and amphibians; therefore, at some point during evolution, fish had a ZPA gene. Fish have either lost the ZPA gene or have an as-yet-unidentified ZPA gene or pseudogene. The alternate possibilities, that the fish ZP genes evolved from a ZPA/ZPB precursor or that the ZPX1 genes are actually ZPA orthologues, are phylogenetically unlikely. Third, the ZPX genes originated from du-

plications before the divergence of fish and amphibians. It is anticipated that genes currently present in fish and amphibians were also present in early amniotes. The absence of any known ZPX orthologues in extant amniotes suggests the loss of ZPX precursors early during amniote evolution.

## ZP GENE NOMENCLATURE

A list of ZP genes is given in Table 1. This list includes the current name assigned to each ZP gene in GenBank followed by a name based on a suggested, standard system of nomenclature. We propose that the basis for this system be the division of the ZP genes into subfamilies based on the evolutionary relationships within the ZP gene family, that these subfamilies should be named in order of their relative size, and that the protein sequence length provides the most reliable and consistent measure of size for this purpose. To minimize the changes involved in adopting a standard nomenclature system, we have modified the closest existing nomenclature system [6]. This system, known as the Harris nomenclature system, groups the ZP genes into three phylogenetic subfamilies, which are then assigned letters alphabetically in order of coding sequence length. These three subfamilies are ZPA, ZPB, and ZPC, with uppercase letters used to indicate subfamilies. The Harris nomenclature does not address the possibility of paralogues within a subfamily. We suggest that group-level paralogues in the same subfamily should be numbered in order of coding sequence length, with reference to *Homo sapiens* when ambiguity exists (in birds and mammals, ZPB/ZP1 genes become ZPB1 and ZPB2 genes). Paralogues below the group level of the phylogeny should be differentiated using an additional lowercase letter, also in order of coding sequence length (in rainbow trout, vitelline envelope proteins  $\alpha$  and  $\beta$  become ZPB $\alpha$  and ZPB $\beta$ , respectively). In all cases, the gene name should follow the hierarchy of the phylogeny: subfamily first (uppercase letter), then group (number, when appropriate), and finally, a paralogue label (lowercase letter, when appropriate).

We have made an exception in the nomenclature system for the two *X. laevis* genes and the *O. latipes* gene that have no known amniote orthologues. To ensure that the *X. laevis* and *O. latipes* ZPA, ZPB, and ZPC genes have the same name as their orthologues, these three sequences are named ZPX1 and ZPX2 (Table 1).

This is only an initial attempt to create a logical system of nomenclature. It is designed to air the current problems and to promote discussion of possible solutions. We propose that those individuals with interest in the ZP genes and proteins establish a working group to examine the problems surrounding the present systems of nomenclature and make recommendations for a new system that would find wide acceptance.

## ACKNOWLEDGMENT

We would like to thank Associate Professor W. Breed, Department of Anatomical Sciences, University of Adelaide, for his helpful comments and suggestions throughout the course of this project.

## REFERENCES

1. Wassarman PM. Mammalian fertilization: molecular aspects of gamete adhesion, exocytosis and fusion. *Cell* 1999; 96:175–183.
2. Parillo F, Fagioli O, Dall'Aglio C, Verini-Supplizi A. Lectin histochemical detection of sulfoglycans in the zona pellucida of mammalian antral oocytes. *Acta Histochem* 2000; 102:193–202.
3. Repin VS, Akimova IM. A study of the protein composition of the

zona pellucida of mammalian oocytes and zygotes by a method of microelectrophoresis in polyacrylamide gel. *Biokhimiia* 1976; 41:50–57.

4. Bleil JD, Wassarman PM. Structure and function of the zona pellucida: identification and characterization of the proteins of the mouse oocyte's zona pellucida. *Dev Biol* 1980; 76:185–202.
5. Tian J, Gong H, Lennarz WJ. *Xenopus laevis* sperm receptor gp69/64 glycoprotein is a homologue of the mammalian sperm receptor ZP2. *Proc Natl Acad Sci U S A* 1999; 96:829–834.
6. Harris JD, Hibler DW, Fontenot GK, Hsu KT, Yurewicz EC, Sacco AG. Cloning and characterization of zona pellucida genes and cDNAs from a variety of mammalian species: the ZPA, ZPB, and ZPC gene families. *DNA Seq* 1994; 4:361–393.
7. Bausek N, Waclawek M, Schneider WJ, Wohrlab F. The major chicken egg envelope protein ZP1 is different from ZPB and is synthesized in the liver. *J Biol Chem* 2000; 275:28866–28872.
8. Wang H, Gong Z. Characterization of two zebrafish cDNA clones encoding egg envelope proteins ZP2 and ZP3. *Biochim Biophys Acta* 1999; 1446:156–160.
9. Kubo H, Kawano T, Tsubuki S, Kotani M, Kawasaki H, Kawashima S. Egg envelope glycoprotein gp37 as a *Xenopus* homologue of mammalian ZP1, based on cDNA cloning. *Dev Growth Differ* 2000; 42:419–427.
10. Vo LH, Hedrick JL. Independent and hetero-oligomeric-dependent sperm binding to egg envelope glycoprotein ZPC in *Xenopus laevis*. *Biol Reprod* 2000; 62:766–774.
11. Epifano O, Liang LF, Dean J. Mouse Zp1 encodes a zona pellucida protein homologous to egg envelope proteins in mammals and fish. *J Biol Chem* 1995; 270:27254–27258.
12. Hughes DC, Barrat LR. Identification of the true human orthologue of the mouse *Zp1* gene: evidence for greater complexity in the mammalian zona pellucida? *Biochim Biophys Acta* 1999; 1447:303–306.
13. Kubo H, Kawano T, Tsubuki S, Kawashima S, Katagiri C, Suzuki A. A major glycoprotein of *Xenopus* egg vitelline envelope, gp41, is a frog homologue of mammalian ZP3. *Dev Growth Differ* 1997; 39:405–417.
14. Yang JC, Hedrick JL. cDNA cloning and sequence analysis of the *Xenopus laevis* egg envelope glycoprotein gp43. *Dev Growth Differ* 1997; 39:457–467.
15. Lindsay LL, Wallace MA, Hedrick JL. A hatching enzyme substrate in the *Xenopus laevis* egg envelope is a high molecular weight ZPA homologue. *Dev Growth Differ* 2001; 43:305–313.
16. Lindsay LL, Yang JC, Hedrick JL. Identification and characterisation of a unique *Xenopus laevis* egg envelope component, ZPD. *Dev Growth Differ* 2002; 44:205–212.
17. Hall TA. BioEdit: a user-friendly biological sequence alignment editor and analysis program for Windows 95/98/NT. *Nucleic Acids Symp Ser* 1999; 41:95–98.
18. Thompson JD, Higgins DG, Gibson TJ. CLUSTAL W: improving the sensitivity of progressive multiple sequence alignment through sequence weighting, positions-specific gap penalties and weight matrix choice. *Nucleic Acids Res* 1994; 22:4673–4680.
19. Felsenstein J. PHYLIP (Phylogeny Inference Package) version 3.5c. Distributed by the author. Seattle: Department of Genetics, University of Washington; 1993: Computer Program.
20. Swofford DL. PAUP\*. Phylogenetic Analysis Using Parsimony (\*and Other Methods). Version 4. Sunderland, MA: Sinauer Associates; 1998: Computer Program.
21. Simon D, Larget B. Bayesian analysis in molecular biology and evolution (BAMBE), version 2.03 beta. Pittsburgh, PA: Department of Mathematics and Computer Science, Duquesne University; 2000: Computer program.
22. Strimmer K, von Haeseler A. Quartet puzzling: a quartet maximum likelihood method for reconstructing tree topologies. *Mol Biol Evol* 1996; 13:964–969.
23. Tamura K, Nei M. Estimation of the number of nucleotide substitutions in the control region of mitochondrial DNA in humans and chimpanzees. *Mol Biol Evol* 1993; 10:512–526.
24. Jermin LS. K2wuli version 1.0. Canberra: John Curtin School of Medical Research, Australian National University; 1996: Computer program.
25. Wu CI, Li WH. Evidence for higher rates of nucleotide substitution in rodents than in man. *Proc Natl Acad Sci U S A* 1985; 82:1741–1745.
26. Bork P, Sander C. A large domain common to sperm receptors (Zp2 and Zp3) and TGF- $\beta$  type III receptor. *FEBS Lett* 1992; 300:237–240.
27. Killick R, Legan PK, Malenczak C, Richardson GP. Molecular cloning of chick  $\beta$ -tectorin, an extracellular matrix molecule of the inner ear. *J Cell Biol* 1995; 129:535–547.
